# Supplementary material for: Advanced Imaging to Phenotype Patients With a Systemic Right Ventricle
Source: PubMed Central journal article supplement — J Am Heart Assoc. 2018 Oct 12;7(20):e009185. doi: 10.1161/JAHA.118.009185 (PMC6474967; doi:10.1161/jaha.118.009185), 2018-10-12
Supplement: JAH3-7-e009185-s001.pdf [file JAH3-7-e009185-s001.pdf]

# **SUPPLEMENTAL MATERIAL**

# Data S1.

## Supplemental Methods

### Gated acquisition sequences:

- Cine sequences: Retrospective-gated balanced steady-state free-precession (SSFP) cine imaging was performed during expiratory breath hold. Thirteen to 18 contiguous 8-mm slices were acquired in a short-axis (SAX) plane followed immediately by 11 to 15 contiguous 8-mm slices in a horizontal long-axis (HLA) plane. Typical imaging parameters were as follows: field of view (FOV), 320×320 mm; acquisition matrix, 192×172; sensitivity encoding (SENSE) factor, 1.7 to 2.0 (Cartesian k-space undersampling); repetition time, 2.8 to 3.4 ms; echo time, 1.4 to 1.7 ms; flip angle, 60°; reconstructed voxel size, 1.4×1.4×8 mm. For each acquired plane 25 phases over the cardiac cycle were reconstructed. For the radial long-axis slices centered on the SAVV annulus and separated by a rotation of 15°, two slices per breath-hold were acquired. Typical imaging parameters were as follows: FOV, 320×280 mm; SENSE factor, 1.7; repetition time, 2.7 ms; echo time, 1.4 ms; flip angle, 60°; reconstructed voxel size, 1.4×1.4×8 mm. For each acquired plane 25 phases over the cardiac cycle were reconstructed.
- MOLLI sequences: For the native T1 acquisition, a single breath-hold seconds-based MOLLI scheme (5s(3s)5s) with balanced SSFP readout was performed on a basal and midventricular SAX slice. Ten to 15 minutes after a 0.2 ml/kg (0.1 mmol/kg) bolus of intravenous gadoterate meglumine (Dotarem®, Guerbet, the Netherlands), a (4s(1s)3s(1s)2s) MOLLI scheme was performed. Typical imaging parameters were as follows: FOV, 300×300 mm; SENSE factor, 2; flip angle, 35°; voxel size, 2.0×2.0×10 mm.

- Velocity mapping of the aorta: Through-plane phase-contrast imaging at expiratory breath-hold at the level of the proximal ascending aorta. Typical imaging parameters were as follows: encoding velocity (VENC), 200 cm/s; FOV, 300×300 mm; SENSE factor, 1.75; repetition time, 5.1 ms; echo time, 3.1 ms; flip angle, 15°; reconstructed voxel size, 1.0×1.0×10 mm.

**Ungated real-time acquisition sequences:**

Forty to 75 consecutive ungated SSFP frames were acquired every 36 to 45 milliseconds at each of 13 to 18 contiguous 8-mm slices in the SAX plane, and 50 consecutive frames were acquired at approximately the same temporal resolution for 11 to 15 contiguous 8-mm slices in the HLA plane. Typical imaging parameters were as follows: FOV, 320×335 mm; matrix, 88×70 (rest) to 80×60 (peak ex.); SENSE factor, 2; repetition time, 1.8 ms; echo time, 0.8 ms; flip angle, 50°; reconstructed voxel size, 2.6×2.6×8 mm. Sufficient frame repetitions were programmed to include at least one complete respiratory cycle (for accurate gating of cardiac translation). The number of frame repetitions could be reduced for each increase in exercise intensity due to tachypnea during exercise. Thus, scan duration was minimized while enabling sufficient data to include multiple cardiac cycles and at least one complete respiratory cycle. Typically, resting scan durations of about 100 seconds were reduced to 60 seconds at peak exercise.

**Table S1. Baseline characteristics in sRV patients and healthy controls.**

| <b>Parameter</b>                                                 | <b>TGA-<br/>Mustard/Senning<br/>N = 23</b> | <b>ccTGA<br/>N= 10</b>        | <b>Healthy<br/>controls<br/>N = 12</b> | <b>P value</b>   |
|------------------------------------------------------------------|--------------------------------------------|-------------------------------|----------------------------------------|------------------|
| <b>Age, y</b>                                                    | <b>34 ± 7</b>                              | <b>45 ± 7</b>                 | <b>39 ± 10</b>                         | <b>0.001</b>     |
| Female sex                                                       | 6 (26)                                     | 2 (20)                        | 3 (25)                                 | 0.931            |
| BMI, kg/m <sup>2</sup>                                           | 23.1 ± 3.6                                 | 24.6 ± 3.9                    | 25.9 ± 4.2                             | 0.120            |
| NYHA class, I/II/III                                             | 14 (61)/ 7 (30)/ 2 (9)                     | 7 (70)/ 3 (30)/ 0 (0)         | 12 (100)/ 0/ 0                         | 0.125            |
| Medical treatment                                                |                                            |                               |                                        |                  |
| <b>Beta blocker</b>                                              | <b>3 (13)</b>                              | <b>4 (40)</b>                 | <b>0</b>                               | <b>0.032</b>     |
| <b>ACE-I/ARB</b>                                                 | <b>9 (39)</b>                              | <b>3 (30)</b>                 | <b>0</b>                               | <b>0.044</b>     |
| Loop diuretic                                                    | 1 (4)                                      | 0                             | 0                                      | 0.613            |
| ECG                                                              |                                            |                               |                                        |                  |
| Heart rhythm,<br>sinus/junctional/AF                             | 22 (96)/ 1 (4)/ 0                          | 8 (80)/ 1 (10)/ 1 (10)        | 12 (100)/ 0/ 0                         | 0.288            |
| <b>Heart rate, bpm</b>                                           | <b>79 ± 17</b>                             | <b>71 ± 18</b>                | <b>64 ± 4</b>                          | <b>0.024</b>     |
| <b>NT-proBNP, ng/L</b>                                           | <b>183 (89 – 299)</b>                      | <b>258 (124 – 642)</b>        | <b>38 (35 - 52)</b><br><b>N = 5</b>    | <b>0.003</b>     |
| Echocardiogram at rest                                           |                                            |                               |                                        |                  |
| <b>SAVV regurgitation,<br/>none-to-<br/>mild/moderate/severe</b> | <b>9 (39)/ 13 (57)/ 1 (4)</b>              | <b>1 (10)/ 5 (50)/ 4 (40)</b> | <b>12 (100)</b>                        | <b>&lt;0.001</b> |
| CPET                                                             |                                            |                               |                                        |                  |
| Peak power output, W                                             | 180 ± 51                                   | 174 ± 37                      | 225 ± 62                               | 0.051            |
| Peak VO <sub>2</sub> , mL/kg/min                                 | 28.6 ± 8.3                                 | 25.6 ± 7.1                    | 33.7 ± 9.8                             | 0.097            |

|                                                                |                     |                     |                       |                  |
|----------------------------------------------------------------|---------------------|---------------------|-----------------------|------------------|
| <b>Peak VO<sub>2</sub>, % of predicted peak VO<sub>2</sub></b> | <b>70 (64 – 92)</b> | <b>82 (61-88)</b>   | <b>103 (86 - 112)</b> | <b>&lt;0.001</b> |
| Resting CMR measures                                           |                     |                     |                       |                  |
| <b>sRVEDVi, mL/m<sup>2</sup></b>                               | <b>127.1 ± 35.5</b> | <b>126.8 ± 40.6</b> | <b>87.3 ± 21.2</b>    | <b>0.005</b>     |
| <b>SVi, mL/m<sup>2</sup></b>                                   | <b>40.6 ± 7.7</b>   | <b>40.8 ± 7.1</b>   | <b>53.4 ± 13.7</b>    | <b>0.001</b>     |
| <b>sRVEF, %</b>                                                | <b>40 ± 7</b>       | <b>42 ± 10</b>      | <b>61 ± 5</b>         | <b>&lt;0.001</b> |
| <b>SAVV RF, %</b>                                              | <b>18 ± 12</b>      | <b>28 ± 11</b>      | <b>4 ± 7</b>          | <b>0.006</b>     |
| <b>sRVESPVR</b>                                                | <b>0.86 ± 0.29</b>  | <b>0.92 ± 0.50</b>  | <b>2.17 ± 1.02</b>    | <b>&lt;0.001</b> |

Values are mean ± SD, median (IQR) or number (%). ACE-I/ARB indicates angiotensin converting enzyme inhibitor or angiotensin receptor blocker; AF, atrial fibrillation; BMI, body mass index; CMR, cardiac magnetic resonance; CPET, cardiopulmonary exercise testing; ECG, electrocardiogram; EF, ejection fraction; EDV, end-diastolic volume; i, indexed to body surface area; NYHA, New York Heart Association; RF, regurgitation fraction; SAVV, systemic atrioventricular valve; sRV, systemic right ventricular; sRVESPVR, sRV end-systolic pressure/volume relationship; SV, stroke volume. Note that for the healthy controls the data of the systemic left ventricle is listed under the sRV heading.

**Table S2. exCMR metrics.**

|                            | TGA-Mustard/Senning patients |                    |                    |                    |
|----------------------------|------------------------------|--------------------|--------------------|--------------------|
|                            | Rest                         | Low intensity      | Moderate intensity | Peak intensity     |
| sRVEDVi, mL/m <sup>2</sup> | 127.1 ± 35.5                 | 121.1 ± 35.6       | 116.3 ± 34.5       | 113.3 ± 34.1       |
| sRVESVi, mL/m <sup>2</sup> | 78.0 ± 30.5                  | 73.9 ± 31.3        | 71.2 ± 30.8        | 68.6 ± 30.1        |
| sRVSVi, mL/m <sup>2</sup>  | 49.0 ± 9.7                   | 47.1 ± 9.8         | 45.1 ± 9.6         | 44.8 ± 10.0        |
| sRVEF, %                   | 40 ± 7                       | 41 ± 9             | 41 ± 9             | 41 ± 9             |
| estimated SAVV RF, %       | 16 ± 10                      | 16 ± 12            | 15 ± 11            | 15 ± 13            |
| LVEDVi, mL/m <sup>2</sup>  | 69.2 ± 15.8                  | 63.5 ± 16.8        | 60.3 ± 17.5        | 58.4 ± 17.9        |
| LVESVi, mL/m <sup>2</sup>  | 25.9 (20.3 – 31.6)           | 22.7 (17.6 – 26.6) | 18.9 (15.4 – 24.2) | 17.9 (13.7 – 22.6) |
| LVSVi, mL/m <sup>2</sup>   | 40.6 ± 7.7                   | 39.2 ± 7.7         | 37.9 ± 6.8         | 37.4 ± 6.8         |
| LVEF, %                    | 63 (56 – 65)                 | 67 (59 – 68)       | 67 (58 – 70)       | 69 (63 – 71)       |
| HR, bpm                    | 69 ± 10                      | 112 ± 17           | 139 ± 21           | 159 ± 21           |
| CI, L/min/m <sup>2</sup>   | 2.76 ± 0.40                  | 4.30 ± 0.69        | 5.20 ± 0.83        | 5.87 ± 0.90        |
| SBP, mmHg                  | 119 ± 12                     | 143 ± 19           | 157 ± 21           | 163 ± 21           |
| RVESPVR, mmHg/mL           | 0.86 ± 0.29                  | 1.11 ± 0.41        | 1.26 ± 0.47        | 1.35 ± 0.48        |

|                            | ccTGA patients |               |                    |                |
|----------------------------|----------------|---------------|--------------------|----------------|
|                            | Rest           | Low intensity | Moderate intensity | Peak intensity |
| sRVEDVi, mL/m <sup>2</sup> | 126.8 ± 40.6   | 128.3 ± 40.4  | 130.0 ± 40.5       | 130.2 ± 39.7   |
| sRVESVi, mL/m <sup>2</sup> | 76.1 ± 36.8    | 73.2 ± 36.2   | 72.8 ± 35.1        | 71.6 ± 35.0    |
| sRVSVi, mL/m <sup>2</sup>  | 50.6 ± 9.0     | 55.1 ± 10.4   | 56.8 ± 12.8        | 58.6 ± 13.6    |
| sRVEF, %                   | 42 ± 10        | 45 ± 10       | 46 ± 10            | 47 ± 11        |
| LVEDVi, mL/m <sup>2</sup>  | 68.1 ± 12.5    | 70.2 ± 17.2   | 71.2 ± 18.5        | 70.9 ± 19.1    |
| LVESVi, mL/m <sup>2</sup>  | 27.3 ± 11.0    | 26.0 ± 7.7    | 25.5 ± 7.7         | 23.8 ± 7.6     |
| LVSVi, mL/m <sup>2</sup>   | 40.9 ± 7.1     | 44.2 ± 10.9   | 45.7 ± 12.8        | 47.2 ± 13.0    |

|                          |             |             |             |             |
|--------------------------|-------------|-------------|-------------|-------------|
| LVEF, %                  | 60 ± 6      | 63 ± 5      | 64 ± 6      | 67 ± 5      |
| HR, bpm                  | 70 ± 13     | 98 ± 27     | 120 ± 34    | 138 ± 38    |
| CI, L/min/m <sup>2</sup> | 2.80 ± 0.40 | 4.14 ± 0.75 | 5.21 ± 1.06 | 6.22 ± 1.37 |
| SBP, mmHg                | 121 ± 15    | 139 ± 23    | 156 ± 24    | 163 ± 29    |
| RVESPVR, mmHg/mL         | 0.92 ± 0.50 | 1.11 ± 0.63 | 1.22 ± 0.64 | 1.31 ± 0.67 |

|                           | Healthy controls |               |                    |                |
|---------------------------|------------------|---------------|--------------------|----------------|
|                           | Rest             | Low intensity | Moderate intensity | Peak intensity |
| LVEDVi, mL/m <sup>2</sup> | 87.3 ± 21.2      | 89.0 ± 18.4   | 89.2 ± 20.2        | 85.8 ± 19.5    |
| LVESVi, mL/m <sup>2</sup> | 33.9 ± 9.2       | 28.7 ± 5.5    | 27.5 ± 7.4         | 26.6 ± 6.7     |
| LVSVi, mL/m <sup>2</sup>  | 53.4 ± 13.7      | 60.2 ± 14.2   | 61.7 ± 14.9        | 59.2 ± 15.5    |
| LVEF, %                   | 61 ± 5           | 67 ± 4        | 69 ± 5             | 69 ± 6         |
| estimated SAVV RF, %      | 4 ± 7            | 3 ± 4         | 2 ± 6              | 4 ± 4          |
| RVEDVi, mL/m <sup>2</sup> | 86.7 ± 24.5      | 86.9 ± 22.2   | 85.6 ± 22.9        | 79.9 ± 20.8    |
| RVESVi, mL/m <sup>2</sup> | 35.4 ± 12.2      | 28.1 ± 8.4    | 25.2 ± 8.6         | 22.5 ± 6.6     |
| RVSVi, mL/m <sup>2</sup>  | 51.3 ± 13.1      | 58.8 ± 15.1   | 60.5 ± 15.1        | 57.3 ± 16.2    |
| RVEF, %                   | 60 ± 6           | 68 ± 5        | 71 ± 4             | 72 ± 5         |
| HR, bpm                   | 64 ± 4           | 100 ± 8       | 124 ± 12           | 144 ± 14       |
| CI, L/min/m <sup>2</sup>  | 3.38 ± 0.91      | 6.32 ± 1.93   | 8.19 ± 2.58        | 8.94 ± 2.85    |
| SBP, mmHg                 | 142 ± 20         | 170 ± 23      | 191 ± 23           | 200 ± 25       |
| LVESPVR, mmHg/mL          | 2.17 ± 1.02      | 2.85 ± 0.75   | 3.45 ± 1.09        | 3.71 ± 1.17    |

Values are mean ± SD or median (IQR). EF indicates ejection fraction; EDV, end-diastolic volume; i, indexed to body surface area; LV, left ventricular; RF, regurgitant fraction; SAVV, systemic atrioventricular valve; sRV, systemic right ventricular; sRVESPVR, sRV end-systolic pressure/volume relationship; and SV, stroke volume.

**Table S3. Baseline characteristics at rest and CPET data in TGA-Mustard/Senning patients with a preserved or impaired exercise capacity according to the median %ppVO<sub>2</sub>.**

|                                                            | TGA-Mustard/Senning                 |                                    |                  |
|------------------------------------------------------------|-------------------------------------|------------------------------------|------------------|
|                                                            | Preserved exercise capacity<br>N=12 | Impaired exercise capacity<br>N=11 | <i>P</i> value   |
| Peak VO <sub>2</sub> , % of predicted peak VO <sub>2</sub> | <b>86 ± 12</b>                      | <b>64 ± 3</b>                      | <b>&lt;0.001</b> |
| Age, y                                                     | 33 ± 5                              | 35 ± 8                             | 0.338            |
| Female                                                     | 2 (17)                              | 4 (36)                             | 0.371            |
| Mustard/ Senning                                           | 2 (17) / 10 (83)                    | 5 (45.5) / 6 (54.5)                | 0.193            |
| NYHA class, I/II/III                                       | <b>11 (92) / 1 (8)</b>              | <b>3 (27) / 6 (55) / 2 (18)</b>    | <b>0.006</b>     |
| Medical treatment                                          |                                     |                                    |                  |
| Beta blocker                                               | 0                                   | 3 (27)                             | 0.093            |
| ACE-I/ARB                                                  | <b>2 (17)</b>                       | <b>7 (64)</b>                      | <b>0.036</b>     |
| Loop diuretic                                              | 0                                   | 1 (9)                              | 0.478            |
| ECG                                                        |                                     |                                    |                  |
| Heart rhythm, sinus/junctional/AF                          | 12 (100) / 0 / 0                    | 10 (91) / 1 (9) / 0                | 0.478            |
| Heart rate, bpm                                            | 82 ± 19                             | 77 ± 15                            | 0.465            |
| QRS width, ms                                              | 103 ± 18                            | 104 ± 16                           | 0.891            |
| Hematocrit                                                 | 0.430 ± 0.030                       | 0.427 ± 0.036                      | 0.839            |
| NT-proBNP, ng/L                                            | 213 (84 – 295)                      | 181 (89 – 415)                     | >0.999           |



|                                                   |                     |                         |                  |
|---------------------------------------------------|---------------------|-------------------------|------------------|
| Echocardiogram at rest                            |                     |                         |                  |
| TAPSE, mm                                         | 11 ± 4              | 11 ± 2                  | 0.617            |
| SAVV regurgitation,<br>mild/moderate/severe       | 6 (50) / 6 (50) / 0 | 3 (27) / 7 (64) / 1 (9) | 0.361            |
| CPET                                              |                     |                         |                  |
| Peak VO <sub>2</sub> , mL/kg/min                  | <b>33.3 ± 8.2</b>   | <b>23.5 ± 4.9</b>       | <b>0.002</b>     |
| Heart rate reserve, bpm                           | <b>97 ± 11</b>      | <b>81 ± 20</b>          | <b>0.032</b>     |
| Anaerobic threshold, %<br>of peak VO <sub>2</sub> | <b>60 ± 12</b>      | <b>42 ± 9</b>           | <b>&lt;0.001</b> |
| Resting CMR measures                              |                     |                         |                  |
| sRV EDVi, mL/m <sup>2</sup>                       | 129.6 ± 41.8        | 124.7 ± 30.2            | 0.747            |
| sRV/LV EDVi ratio                                 | 1.9 ± 0.4           | 1.8 ± 0.6               | 0.566            |
| SVi, mL/m <sup>2</sup>                            | 39.5 ± 9.5          | 41.8 ± 5.5              | 0.485            |
| sRV mass i, g/m <sup>2</sup>                      | 79.7 ± 14.2         | 86.9 ± 21.5             | 0.578            |
| sRV EF, %                                         | 39 ± 5              | 41 ± 9                  | 0.345            |
| GLS, %                                            | -11.6 ± 2.4         | -11.6 ± 2.7             | 0.974            |
| GCS, %                                            | -15.5 ± 3.0         | -16.1 ± 4.2             | 0.632            |
| sRVESPVR                                          | 0.81 ± 0.20         | 0.91 ± 0.37             | 0.437            |
| Native T1 of septal<br>myocardium, ms             | 1018 ± 37           | 1030 ± 43               | 0.481            |
| ECV of septal<br>myocardium, %                    | 26.9 ± 2.2          | 27.2 ± 3.2              | 0.801            |

Values are mean ± SD, median (IQR) or number (%). ACE-I/ARB indicates angiotensin converting enzyme inhibitor or angiotensin receptor blocker; AF, atrial fibrillation; CMR,

cardiac magnetic resonance; CPET, cardiopulmonary exercise testing; ECG, electrocardiogram; EF, ejection fraction; ECV, extracellular volume; EDV, end-diastolic volume; GLS, global longitudinal strain; GCS, global circumferential strain; i, indexed to body surface area; LV, left ventricular; NYHA, New York Heart Association; SAVV, systemic atrioventricular valve; sRV, systemic right ventricular; sRVESPVR, sRV end-systolic pressure/volume relationship; SV, stroke volume; and TAPSE, tricuspid annular plane systolic excursion.
